# Supplementary material for: Synthesis, photocatalytic and antibacterial activities of a PDS-activated MgO nanocatalyst: experimental and theoretical studies
Source: Royal Society of Chemistry journal article supplement (doi:10.1039/d1nj05195d), 2022-01-01
Supplement: d1nj05195d1.pdf [file d1nj05195d1.pdf]

Supporting information for:

## Synthesis, photocatalytic and antibacterial activities of PDS activated MgO nano-catalyst: Experimental and Theoretical studies

Suranjan Sikdar<sup>a,\*</sup>, Afroja Banu<sup>a,c</sup>, Shohini Chakraborty<sup>b</sup>, Nabajyoti Baildya<sup>d</sup>, Sukanta Majumdar<sup>b</sup>

<sup>a</sup>Department of Chemistry, Govt. General Degree College at Kushmandi, Kushmandi, Dakshin Dinajpur, India.

<sup>b</sup>Department of Botany, University of Gour Banga, Malda, India.

<sup>c</sup>Department of Chemistry, University of North Bengal, Darjeeling, India

<sup>d</sup>Department of Chemistry, University of Kalyani, Nadia, India

\*Corresponding Author:

Suranjan Sikdar, [suranium9@gmail.com](mailto:suranium9@gmail.com)

**Table S1:** Lattice parameters of MgO NPs

| FWHM     | 2θ      | Size (nm) | Average Size(nm) | Dislocation density ( $\delta \times 10^{-3}(\text{nm}^{-2})$ ) | Micro-strain( $\epsilon \times 10^{-3}$ ) |
|----------|---------|-----------|------------------|-----------------------------------------------------------------|-------------------------------------------|
| 0.35305  | 18.7312 | 22.80591  | 18.60171         | 1.922671889                                                     | 9.340019088                               |
| 0.4251   | 38.1345 | 19.77287  |                  | 2.557764534                                                     | 5.36640172                                |
| 0.624259 | 50.8456 | 14.09039  |                  | 5.036791371                                                     | 5.730519561                               |
| 0.485165 | 58.9048 | 18.80462  |                  | 2.827943084                                                     | 3.748929331                               |
| 0.52948  | 62.3325 | 17.53475  |                  | 3.252377177                                                     | 3.819822222                               |

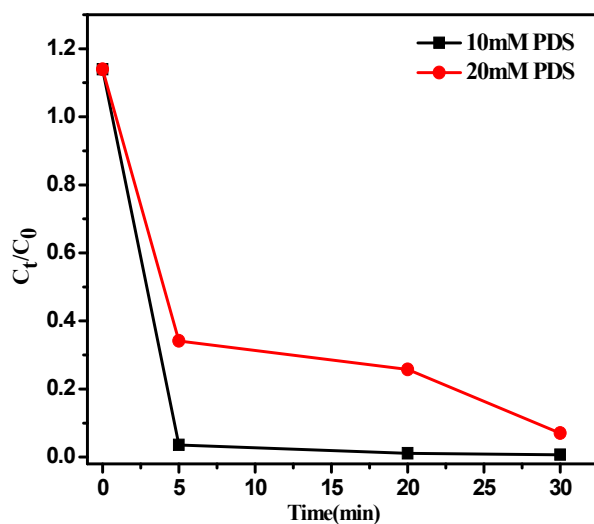

**Fig. S1** Different PDS concentration: [MB] =5 mg/L, [MgO] =10mM, pH=9, T= 298.15K)

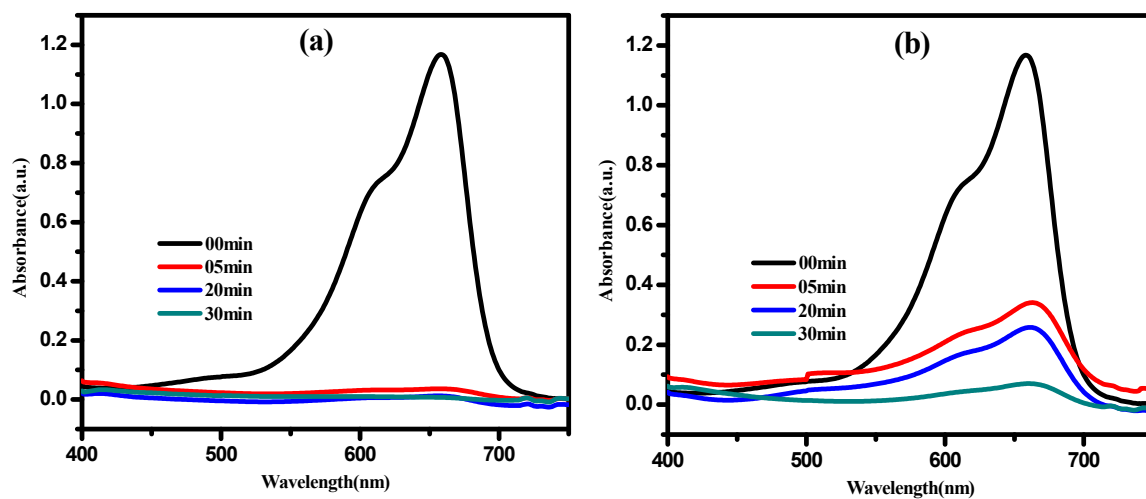

**Fig. S2** UV-visible absorption spectra of different PDS concentration with time: (a) [PDS]=10mg/L, [MB] =5 mg/L, [MgO]=10mM, pH=9, T= 298.15K and (b) [PDS]= 20mg/L, [MB] =5 mg/L, [MgO]=10mM, pH=9, T= 298.15K)

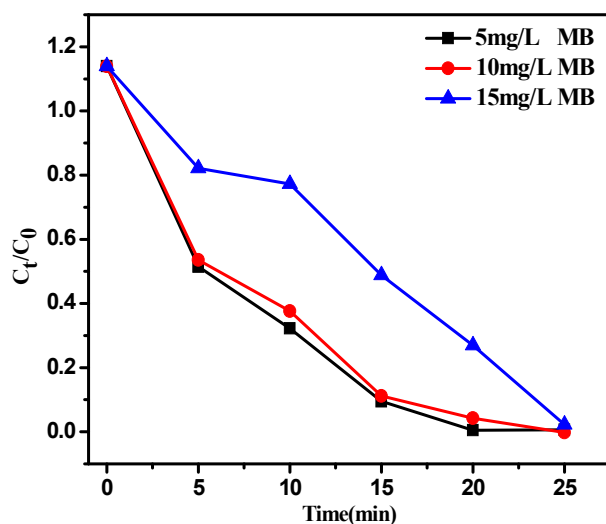

Fig. S3 Different dye concentration: [MgO] =5mM, [PDS]=10mM, pH= 9, T= 298.15K

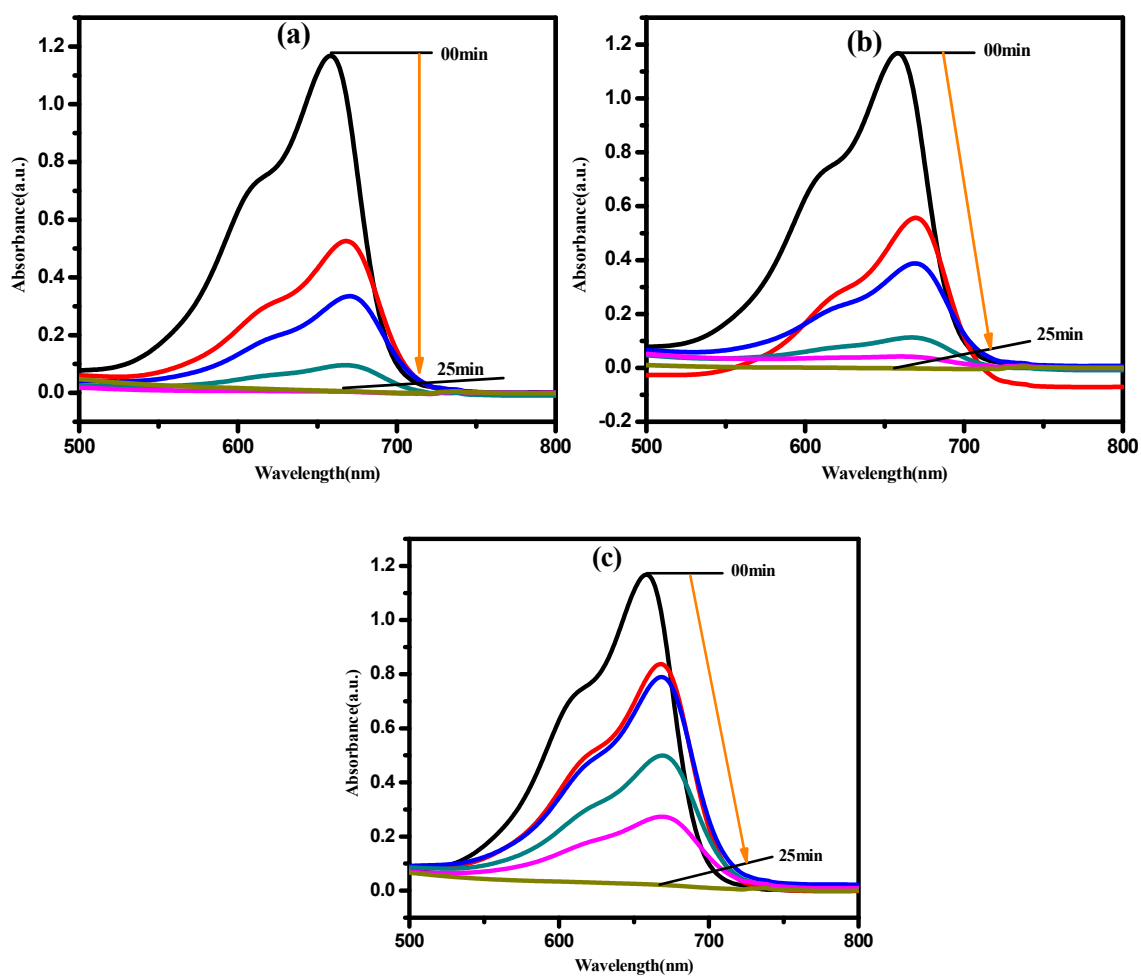

Fig. S4 UV-visible absorption spectra of different dye concentration with time: (a) [MB]=5mg/L, [MgO] =5mM, [PDS]=10mM, pH= 9, T= 298.15K (b) [MB]=10mg/L, [MgO]

=5mM, [PDS]=10mM, pH= 9, T= 298.15K and (c) [MB]=15mg/L, [MgO] =5mM, [PDS]=10mM, pH= 9, T= 298.15K

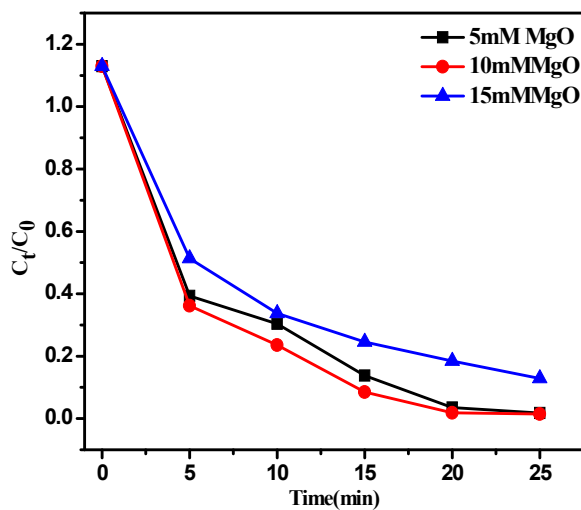

Fig. S5 Different MgO concentration: [MB] =5 mg/L, [PDS] = 10mM, pH= 9, T= 298.15K

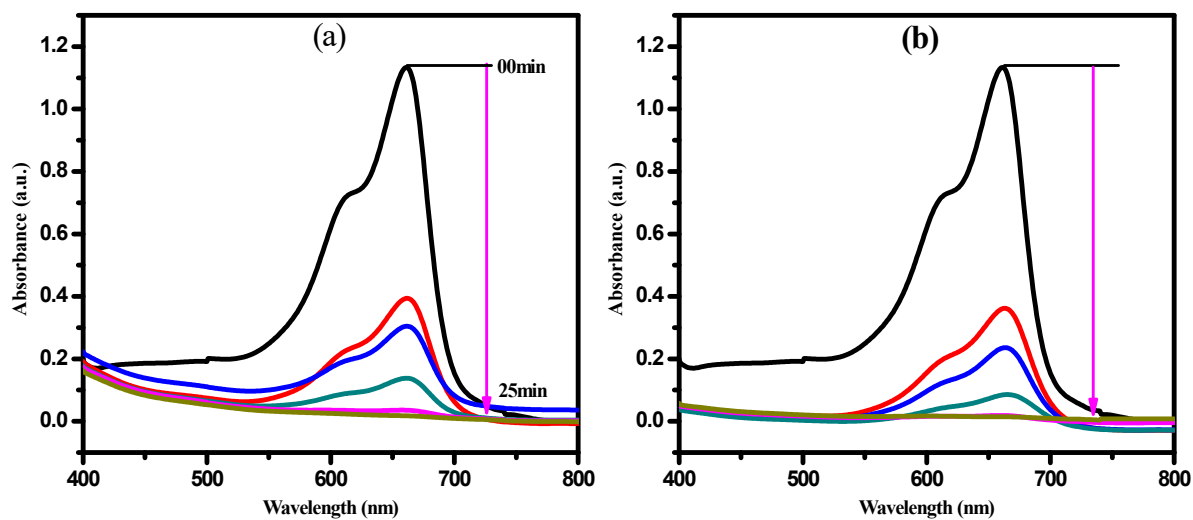

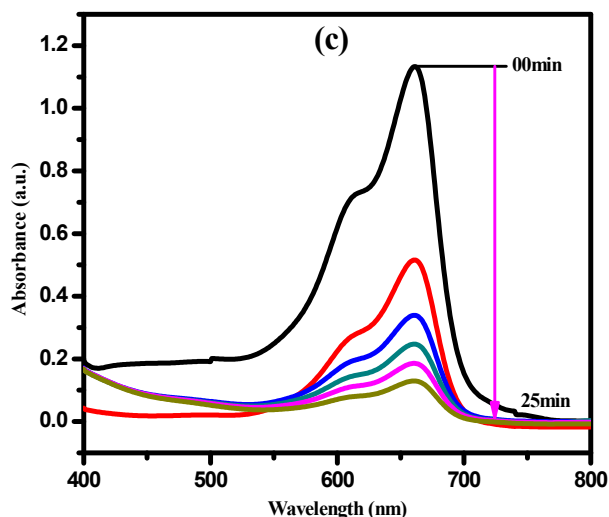

**Fig. S6** UV-visible absorption spectra of different catalyst dosage with time: (a) [MB]=5mg/L, [MgO] =5mM, [PDS]=10mM, pH= 9, T= 298.15K (b) [MB]=5mg/L, [MgO] =10mM, [PDS]=10mM, pH= 9, T= 298.15K and (c) [MB]=5mg/L, [MgO] =15mM, [PDS]=10mM, pH= 9, T= 298.15K

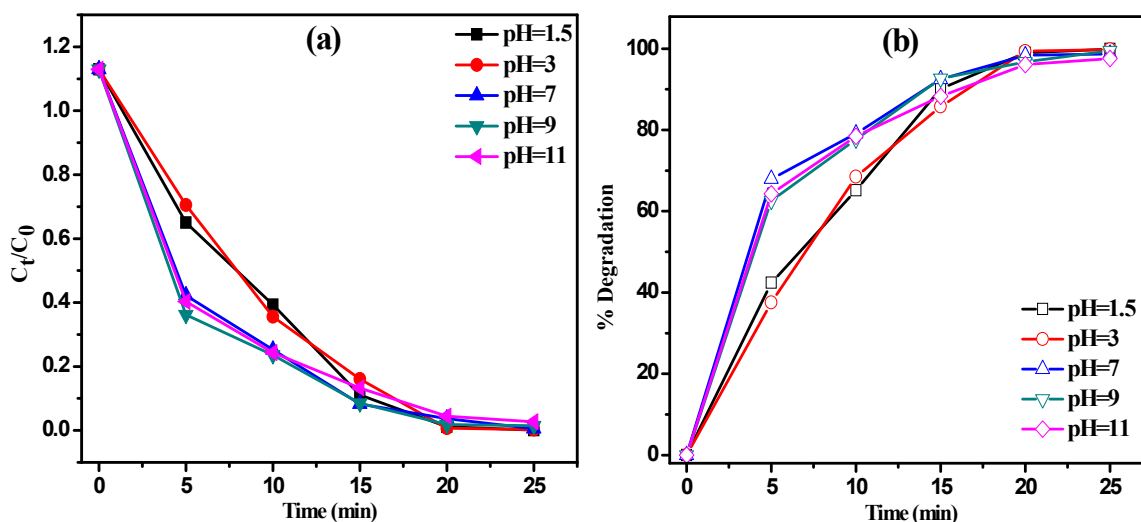

**Fig. S7** (a) Different  $p^H$  values: [MB] =5 mg/L, [MgO] = 10Mm [PDS]=10Mm, T= 298.15K (b) plot of % degradation with the variation of  $p^H$  values from 1.5 to 11

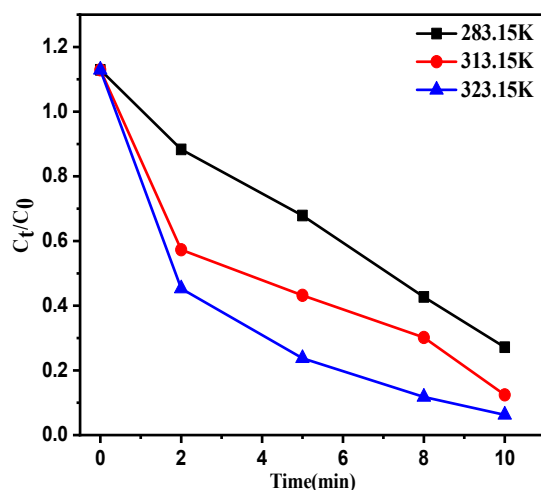

**Fig. S8** Different temperatures: [MB] =5 mg/L, [MgO]= 10Mm [PDS]= 10Mm,  $p^H=9$

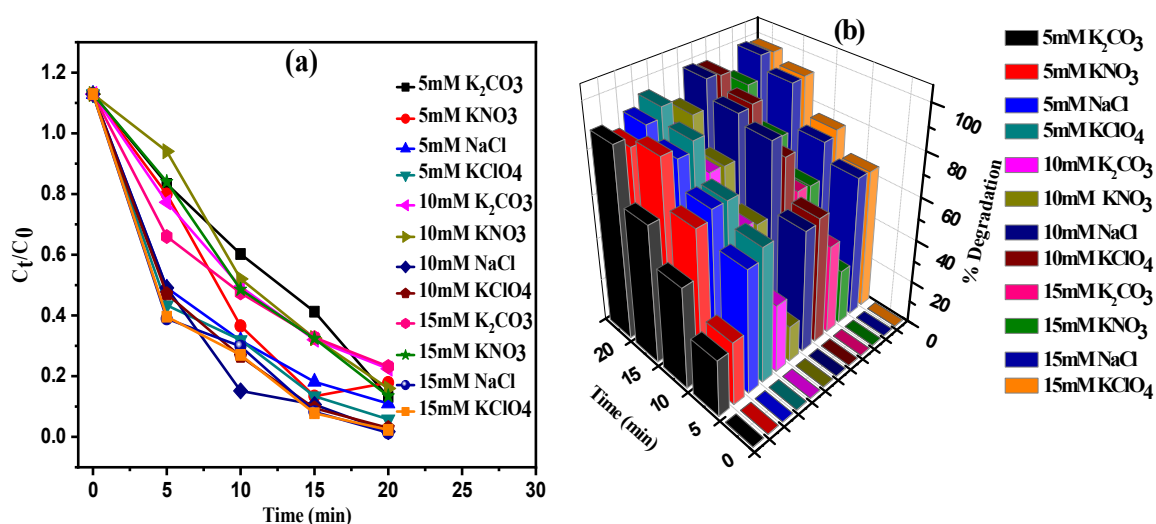

**Fig. S9** (a) Different ionic salts ([MB] =5 mg/L, [MgO] =10Mm [PDS] = 10Mm, T= 298.15K) (b) 3D plot of % degradation with the variation of concentration of different salts

**Table S2** Kinetic parameters obtained from different kinetic model at different reaction conditions

| Parameters | Zero order             |         | 1 <sup>st</sup> Order  |         |
|------------|------------------------|---------|------------------------|---------|
|            | $k_1(\text{min}^{-1})$ | $R^2$   | $k_1(\text{min}^{-1})$ | $R^2$   |
| MgO +MB    | 0.01977                | 0.85724 | 0.76179                | 0.76179 |
| PDS dosage |                        |         |                        |         |

|                                |         |         |         |         |
|--------------------------------|---------|---------|---------|---------|
| 10mM PDS                       | 0.02779 | 0.19787 | 0.14577 | 0.61519 |
| 20mM PDS                       | 0.02797 | 0.49763 | 0.07756 | 0.80237 |
| Dye concentration              |         |         |         |         |
| 5mg/L                          | 0.02779 | 0.04301 | 0.23485 | 0.88265 |
| 10mg/L                         | 0.04247 | 0.81163 | 0.23567 | 0.85224 |
| 15mg/L                         | 0.04301 | 0.9775  | 0.13369 | 0.68852 |
| Dosage of MgO                  |         |         |         |         |
| 5mM                            | 0.03885 | 0.70473 | 0.16503 | 0.96719 |
| 10mM                           | 0.03859 | 0.65306 | 0.18076 | 0.96675 |
| 15mM                           | 0.03473 | 0.7078  | 0.08136 | 0.9505  |
| Temperature                    |         |         |         |         |
| 283.15K                        | 0.08318 | 0.99071 | 0.13687 | 0.96402 |
| 298.15K                        | 0.043   | 0.794   | 0.087   | 0.95    |
| 313.15K                        | 0.08585 | 0.8079  | 0.19057 | 0.90496 |
| 323.15K                        | 0.09321 | 0.7109  | 0.27223 | 0.97998 |
| pH value                       |         |         |         |         |
| pH=1.5                         | 0.04479 | 0.86283 | 0.27343 | 0.89124 |
| pH=7                           | 0.04527 | 0.87515 | 0.25718 | 0.88449 |
| pH=9                           | 0.03966 | 0.70085 | 0.19845 | 0.96102 |
| pH=11                          | 0.03827 | 0.67707 | 0.14772 | 0.9848  |
| Salts                          |         |         |         |         |
| K <sub>2</sub> CO <sub>3</sub> | 0.7109  | 0.99325 | 0.10019 | 0.86697 |
| KNO <sub>3</sub>               | 0.05132 | 0.8557  | 0.10945 | 0.84213 |
| NaCl                           | 0.04696 | 0.76688 | 0.11308 | 0.98383 |
| KClO <sub>4</sub>              | 0.04884 | 0.76179 | 0.14222 | 0.97615 |
